# Supplementary material for: Multicellular Human Gastric Cancer Spheroids Mimic the Glycosylation Phenotype of Gastric Carcinomas
Source: MDPI journal article supplement (doi:10.3390/molecules23112815), 2018-10-30
Supplement: s1 [file s1]

# Supplementary Material:

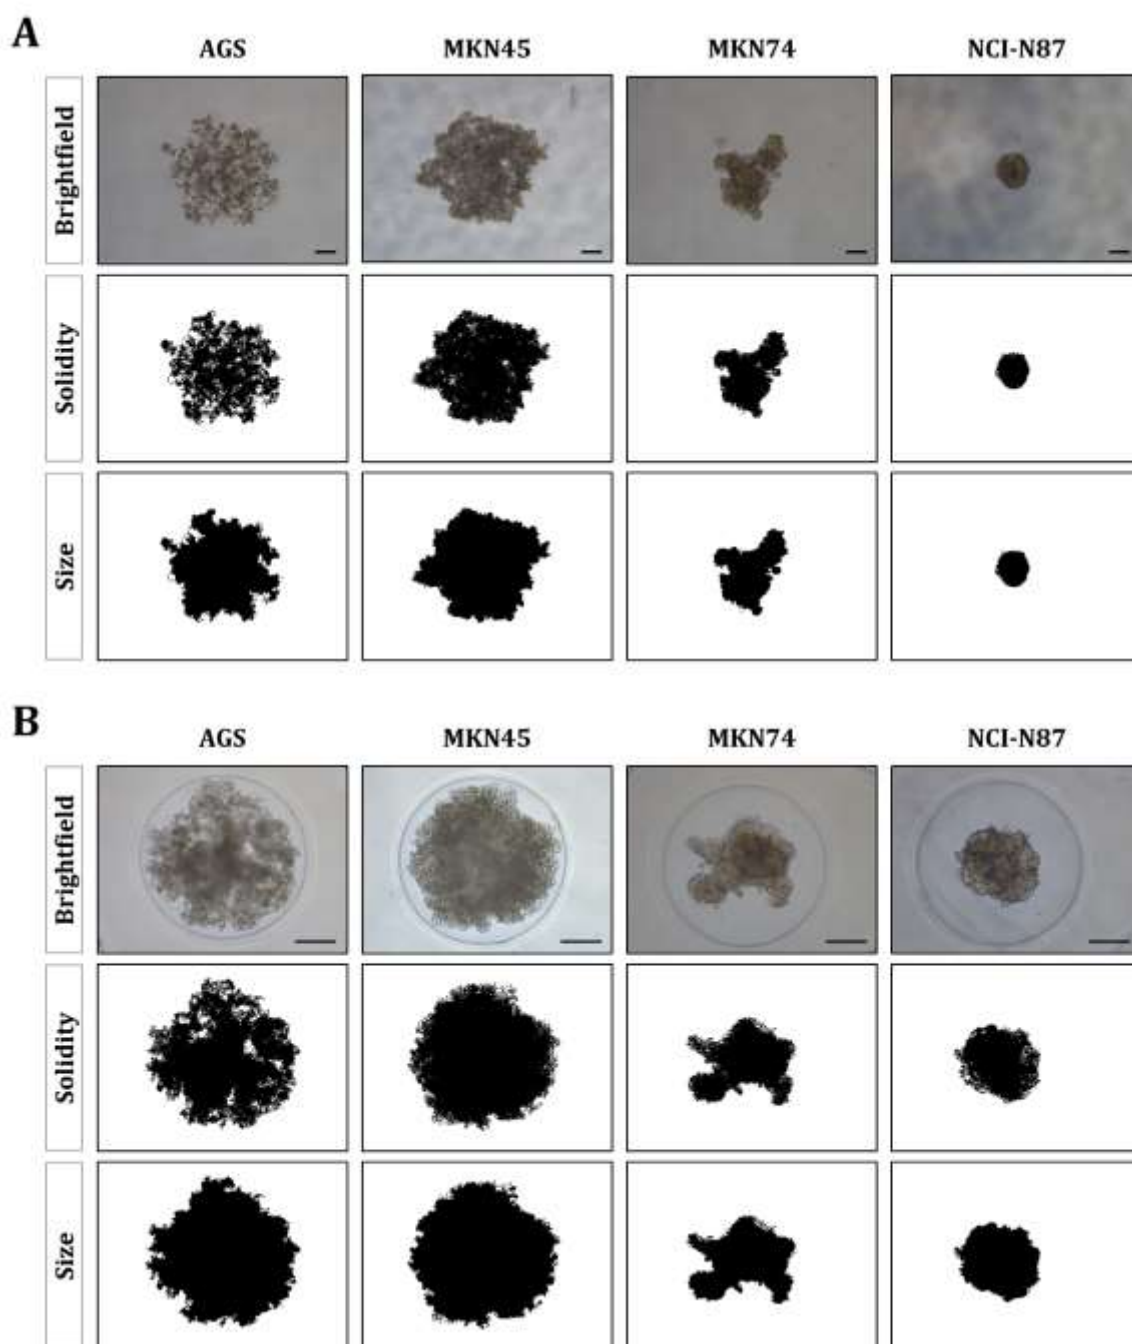

**Figure S1.** Standardized method for imaging analysis of tumor spheroids. Multicellular tumor spheroids of the four gastric cancer cell lines grown in **(A)** ultralow attachment (ULA) 96-well round-bottomed plates or **(B)** using a 3D Petri Dish® (MICROTISSUES® technology). Images were obtained with a Leica DMi1 microscope and imaging analysis was conducted with open-source Fiji software. Scale bar represents 200  $\mu\text{m}$ .



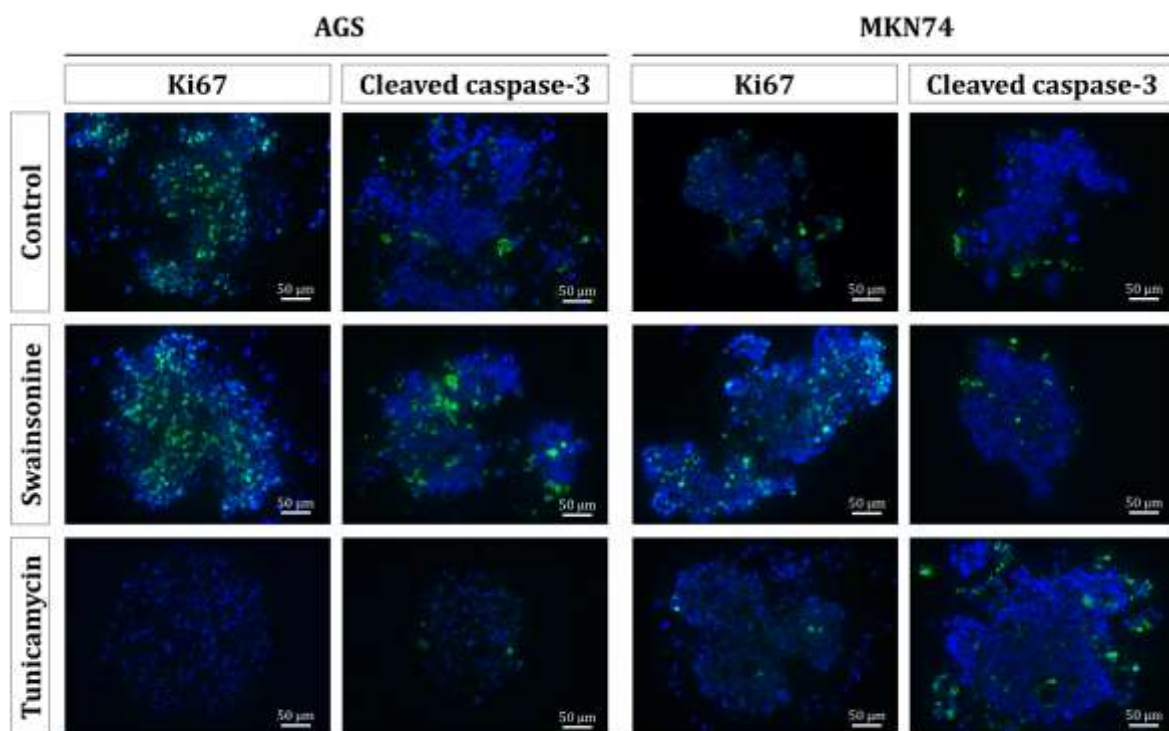

**Figure S3.** Cell proliferation and apoptotic status of gastric multicellular tumour spheroids (MCTS) treated with *N*-glycan inhibitors. Evaluation of Ki67 and cleaved caspase-3 of AGS, and MKN74 MCTS after treatment with 5  $\mu$ g/mL of swainsonine or 1  $\mu$ g/mL of tunicamycin.
